# Supplementary material for: A 20-Year Analysis of the Dynamics and Driving Factors of Grassland Desertification in Xilingol, China
Source: MDPI journal article supplement (doi:10.3390/rs15245716), 2023-12-13
Supplement: s1 [file s1]

## Supplementary materials

**Table S1.** Statistics of area with different desertification levels (Unit: km<sup>2</sup>).

| Year | I        | II       | III      | IV       | V        |
|------|----------|----------|----------|----------|----------|
| 2000 | 44518.60 | 60079.87 | 61388.17 | 27780.69 | 8281.21  |
| 2002 | 54913.17 | 41624.93 | 46882.30 | 43570.06 | 15009.12 |
| 2004 | 28395.93 | 44344.86 | 39155.07 | 50662.23 | 39526.06 |
| 2006 | 52274.54 | 41818.87 | 52779.12 | 41393.89 | 13815.85 |
| 2008 | 59122.14 | 37249.81 | 47228.01 | 41872.54 | 16601.81 |
| 2010 | 56903.04 | 48520.86 | 55841.82 | 29872.40 | 10912.78 |
| 2012 | 23646.50 | 39546.74 | 40208.59 | 66107.02 | 32556.73 |
| 2014 | 46517.35 | 33693.17 | 45799.00 | 50041.33 | 25982.24 |
| 2016 | 37556.55 | 41970.32 | 60398.53 | 39705.67 | 22428.92 |
| 2018 | 16171.64 | 32064.99 | 36882.89 | 53273.86 | 63671.42 |
| 2020 | 30606.31 | 44620.17 | 51260.36 | 54934.55 | 20633.46 |

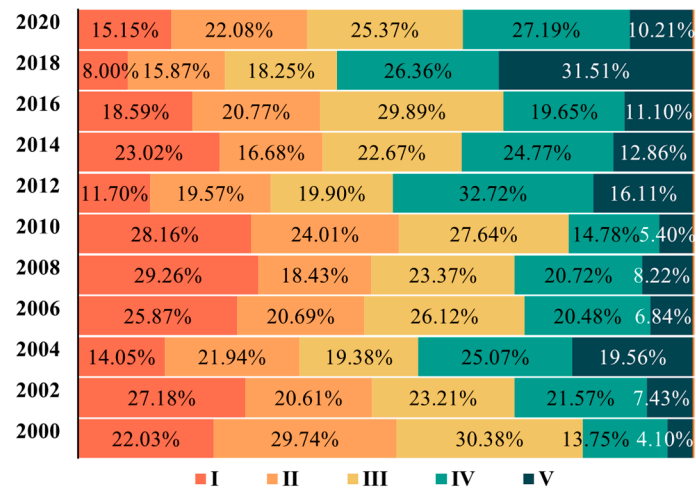

**Figure S1.** Proportion of DGL at different desertification levels.
